# Supplementary material for: In silico analysis of the cyclophilin repertoire of apicomplexan parasites
Source: PubMed Central journal article supplement (PMC2713222; doi:10.1186/1756-3305-2-27), 2009-06-25
Supplement: 1756-3305-2-27-S1.pdf [file 1756-3305-2-27-S1.pdf]

**Tab. S1: Cyclophilins from *H. sapiens* and *S. pombe***

| Name              | Entrez Gene Accession -no. | Species                          | Group      | Size (amino acids/kDa) | Domains <sup>a</sup> |
|-------------------|----------------------------|----------------------------------|------------|------------------------|----------------------|
| <i>HsPPIA1</i>    | 5478                       | <i>Homo sapiens</i>              | Vertebrata | 165/18.0               | Cyp                  |
| <i>HsPPIAL4A</i>  | 164022                     | <i>Homo sapiens</i>              | Vertebrata | 164/18.2               | Cyp                  |
| <i>HsPPIAL4B</i>  | 653505                     | <i>Homo sapiens</i>              | Vertebrata | 164/18.2               | Cyp                  |
| <i>HsPPIAL4C</i>  | 653598                     | <i>Homo sapiens</i>              | Vertebrata | 164/18.2               | Cyp                  |
| <i>HsPPIAL4E</i>  | 730262                     | <i>Homo sapiens</i>              | Vertebrata | 164/18.2               | Cyp                  |
| <i>HsPPIAL4F</i>  | 728945                     | <i>Homo sapiens</i>              | Vertebrata | 164/18.2               | Cyp                  |
| <i>HsPPIAL4G</i>  | 644591                     | <i>Homo sapiens</i>              | Vertebrata | 164/18.2               | Cyp                  |
| <i>HsPPIB</i>     | 5479                       | <i>Homo sapiens</i>              | Vertebrata | 216/23.7               | Cyp                  |
| <i>HsPPIC</i>     | 5480                       | <i>Homo sapiens</i>              | Vertebrata | 212/22.8               | Cyp                  |
| <i>HsPPID</i>     | 5481                       | <i>Homo sapiens</i>              | Vertebrata | 370/40.8               | Cyp<br>TRP           |
| <i>HsPPIE</i>     | 10450                      | <i>Homo sapiens</i>              | Vertebrata | 301/33.4               | RRM<br>Cyp           |
| <i>HsPPIF</i>     | 10105                      | <i>Homo sapiens</i>              | Vertebrata | 207/22.0               | Cyp                  |
| <i>HsPPIG</i>     | 9360                       | <i>Homo sapiens</i>              | Vertebrata | 247/27.5               | Cyp                  |
| <i>HsPPIH</i>     | 10465                      | <i>Homo sapiens</i>              | Vertebrata | 177/19.3               | Cyp                  |
| <i>HsPPIL1</i>    | 51645                      | <i>Homo sapiens</i>              | Vertebrata | 166/18.2               | Cyp                  |
| <i>HsPPIL2</i>    | 23759                      | <i>Homo sapiens</i>              | Vertebrata | 520/58.8               | RING<br>Cyp          |
| <i>HsPPIL3</i>    | 53938                      | <i>Homo sapiens</i>              | Vertebrata | 161/18.1               | Cyp                  |
| <i>HsPPIL4</i>    | 85313                      | <i>Homo sapiens</i>              | Vertebrata | 492/57.2               | Cyp<br>RRM           |
| <i>HsPPIL6</i>    | 285755                     | <i>Homo sapiens</i>              | Vertebrata | 311/35.2               |                      |
| <i>HsPPWD1</i>    | 23398                      | <i>Homo sapiens</i>              | Vertebrata | 646/73.6               | WD40<br>Cyp          |
| <i>HsSDCCAG10</i> | 10283                      | <i>Homo sapiens</i>              | Vertebrata | 472/53.8               | Cyp                  |
| <i>HsNKTR</i>     | 4820                       | <i>Homo sapiens</i>              | Vertebrata | 1462/165.7             | Cyp                  |
| <i>SpCyp1</i>     | 2543019                    | <i>Schizosaccharomyces pombe</i> | Fungi      | 155/16.7               | Cyp                  |
| <i>SpCyp2</i>     | 2540269                    | <i>Schizosaccharomyces pombe</i> | Fungi      | 162/17.4               | Cyp                  |
| <i>SpCyp3</i>     | 2540198                    | <i>Schizosaccharomyces pombe</i> | Fungi      | 173/18.9               | Cyp                  |
| <i>SpCyp4</i>     | 2541395                    | <i>Schizosaccharomyces pombe</i> | Fungi      | 201/22.2               | Cyp                  |
| <i>SpCyp5</i>     | 2542541                    | <i>Schizosaccharomyces pombe</i> | Fungi      | 356/40.2               | Cyp<br>TPR<br>NLS    |
| <i>SpCyp6</i>     | 2539942                    | <i>Schizosaccharomyces pombe</i> | Fungi      | 432/50.8               | Cyp<br>RRM           |
| <i>SpCyp7</i>     | 2540067                    | <i>Schizosaccharomyces pombe</i> | Fungi      | 463/52.2               | Cyp                  |
| <i>SpCyp8</i>     | 2541969                    | <i>Schizosaccharomyces pombe</i> | Fungi      | 471/53.6               | RING<br>Cyp          |
| <i>SpCyp9</i>     | 2539557                    | <i>Schizosaccharomyces pombe</i> | Fungi      | 610/69                 | WD40<br>Cyp          |

<sup>a</sup>Cyp, cyclophilin domain; RRM, RNA recognition motif; RING, RING finger domain; TRP, Tetratricopeptide repeat; WD40, WD40 repeat.
