# Supplementary material for: In silico analysis of the cyclophilin repertoire of apicomplexan parasites
Source: PubMed Central journal article supplement (PMC2713222; doi:10.1186/1756-3305-2-27), 2009-06-25
Supplement: 1756-3305-2-27-S2.pdf [file 1756-3305-2-27-S2.pdf]

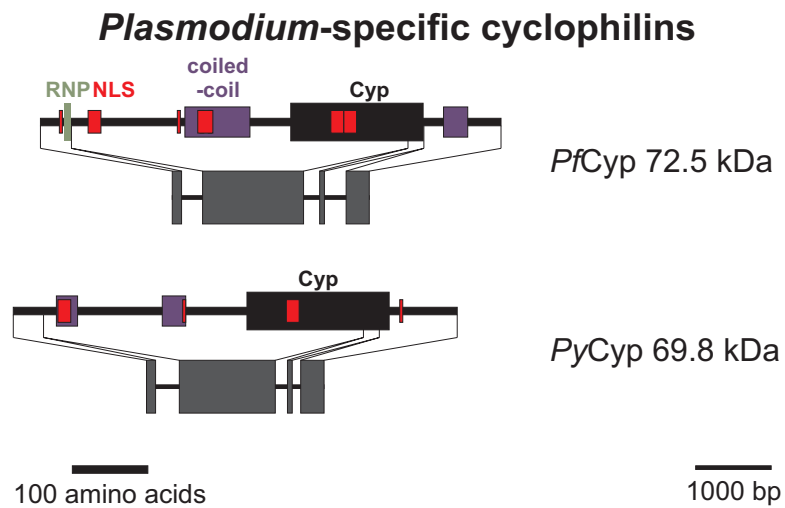

**Figure S1 - *Plasmodium*-specific Cyps**

Domain architecture and genomic organization of *Plasmodium*-specific Cyps. Species are abbreviated as in Fig. 1. Cyp, Cyp domain (CD accession-no.: [cd00317]); RNP, RNA-binding motif (InterPro accession-no.: [IPR000504]) coiled-coil, coiled-coil protein interaction domain; NLS, nuclear localization signal.
