# Supplementary material for: In silico analysis of the cyclophilin repertoire of apicomplexan parasites
Source: PubMed Central journal article supplement (PMC2713222; doi:10.1186/1756-3305-2-27), 2009-06-25
Supplement: 1756-3305-2-27-S3.pdf [file 1756-3305-2-27-S3.pdf]

### PPIL6-like *TgCyp36.7*

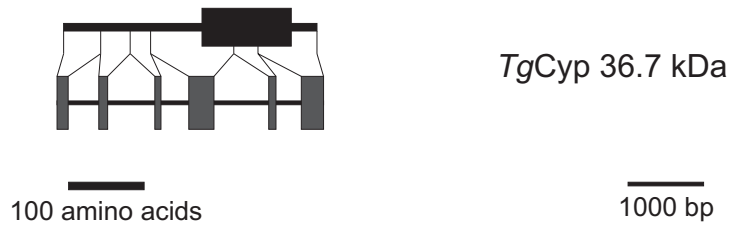

#### Figure S2 - PPIL6-like Cyp *TgCyp36.7*

Domain architecture and genomic organization of *TgCyp36.7*. Species are abbreviated as in Fig. 1. Cyp, Cyp domain (CD accession-no.: [cd00137]).
