# Supplementary material for: In silico analysis of the cyclophilin repertoire of apicomplexan parasites
Source: PubMed Central journal article supplement (PMC2713222; doi:10.1186/1756-3305-2-27), 2009-06-25
Supplement: 1756-3305-2-27-S4.pdf [file 1756-3305-2-27-S4.pdf]

**Table S2: Protein sequences used to analyse evolution of cyclophilin domains in dual class immunophilins**

| Name                | Accession-no.    | Species                                   | Group                       | Size (amino acids/kDa)             | Domains <sup>a</sup>                      |
|---------------------|------------------|-------------------------------------------|-----------------------------|------------------------------------|-------------------------------------------|
| <i>Ta</i> FCBP51.3  | XP_951815        | <i>Theileria annulata</i>                 | Apicomplexa                 | 459/51.3 <sup>b</sup>              | FKBP<br>TPR repeats<br>cyclophilin        |
| <i>Tp</i> FCBP51.4  | XP_765469        | <i>Theileria parva</i>                    | Apicomplexa                 | 460/51.4                           | FKBP<br>TPR repeats<br>cyclophilin        |
| <i>Tg</i> FCBP57.3  | AAAX51680        | <i>Toxoplasma gondii</i>                  | Apicomplexa                 | 521/57.3                           | FKBP<br>TPR repeats<br>cyclophilin        |
| <i>Bb</i> FCBP51.1  | YP_00188384<br>1 | <i>Babesia bovis</i>                      | Apicomplexa                 | 339/51.1                           | FKBP<br>TPR repeats<br>cyclophilin        |
| <i>Gj</i> Cyp21.5   | AAM93985         | <i>Griffithsia japonica</i>               | Rhodophyta                  | 198/21.5                           | Single<br>cyclophilin                     |
| <i>Pt</i> FCBP51.3  | XP_00144455<br>4 | <i>Paramecium tetraurelia</i> strain d4-2 | Ciliophora                  | 456/51.3                           | FKBP<br>TPR repeats<br>cyclophilin        |
| <i>Pt</i> FCBP52.6  | XP_00144526<br>8 | <i>Paramecium tetraurelia</i> strain d4-2 | Ciliophora                  | 467/52.6                           | FKBP<br>TPR repeats<br>cyclophilin        |
| <i>Tt</i> FCBP131.6 | XP_976669        | <i>Tetrahymena thermophila</i>            | Ciliophora                  | 1134/131.6                         | ATB-binding<br>FKBP<br>TRP<br>cyclophilin |
| <i>Cw</i> Cyp19.4   | ZP_00517449      | <i>Crocospaera watsonii</i>               | Cyanobacteria               | 174/19.4                           | Single<br>cyclophilin                     |
| <i>Pca</i> FCBP52.5 | BT031867         | <i>Phytophthora capsici</i>               | Oomycetes                   | 479/52.5                           | FKBP<br>TPR repeats<br>cyclophilin        |
| <i>Mm</i> CypD      | NP_080628        | <i>Mus musculus</i>                       | Vertebrata                  | 370/40.7                           | Cyclophilin<br>TRP repeats                |
| <i>Eh</i> Cyp18.1   | EAL51109         | <i>Entamoeba histolytica</i>              | Entamoebidae                | 167/18.1                           | Single<br>cyclophilin                     |
| <i>Ot</i> CPR7      | CAL55134         | <i>Ostreococcus tauri</i>                 | Chlorophyta                 | >266 (only<br>partial<br>sequence) | FCBP<br>cyclophilin                       |
| <i>Tc</i> Cyp22.9   | XP_808570        | <i>Trypanosoma cruzi</i>                  | Kinetoplastida              | 210/22.9                           | Single<br>cyclophilin                     |
| <i>Ss</i> Cyp18.5   | NP_441161        | <i>Synechocystis</i> sp. PCC 6803         | Cyanobacteria               | 171/18.5                           | Single<br>cyclophilin                     |
| <i>Ci</i> Cyp1      | AAV48823         | <i>Codonopsis lanceolata</i>              | Spermatophyta               | 174/18.9                           | Single<br>cyclophilin                     |
| <i>Cb</i> Cyp18.6   | 39582840         | <i>Caenorhabditis briggsae</i>            | Nematoda                    | 172/18.6                           | Single<br>cyclophilin                     |
| <i>Bm</i> Cyp21     | ZP_01088483      | <i>Blastopirellula marina</i>             | Bacteria,<br>Planctomycetes | 199/21.0                           | Single<br>cyclophilin                     |
| <i>Sa</i> Cyp7      | ZP_01467010      | <i>Stigmatella aurantiaca</i>             | Bacteria,<br>Proteobacteria | 171/18.8                           | Single<br>cyclophilin                     |
| <i>Ar</i> FCBP38.1  | AAU82569         | uncultured archaeon GZfos18C8             | Archea                      | 357/38.1                           | FKBP<br>Cyclophilin                       |
| <i>Ar</i> FCBP39.7  | CAI64202         | uncultured archaeon GZfos18C8             | Archea                      | 369/39.7                           | FKBP<br>Cyclophilin                       |
| <i>Cb</i> CypB      | ZP_00909097      | <i>Clostridium beijerincki</i>            | Bacteria,<br>Clostridia     | 226/24.1                           | Cyclophilin                               |
| <i>Mb</i> Cyp15.3   | YP_566142        | <i>Methanococcoides burtonii</i>          | Archaea,<br>Methanomicrobia | 141/15.3                           | Cyclophilin                               |
| <i>Gj</i> CFBP41    | CAL65762         | <i>Gramella forsetii</i>                  | Flavobacteria               | 376/41.0                           | Cyclophilin<br>FKBP                       |
| <i>Ca</i> CFBP41.7  | ZP_00950792      | <i>Croceibacter atlanticus</i>            | Flavobacteria               | 378/41.7                           | Cyclophilin<br>FKBP                       |
| <i>Fb</i> CFBP42.3  | ZP_01106954      | <i>Flavobacteriales bacterium</i>         | Flavobacteria               | 386/42.3                           | Cyclophilin<br>FKBP                       |
| <i>Fba</i> CFBP42.1 | ZP_01202369      | <i>Flavobacteria bacterium</i>            | Flavobacteria               | 385/42.1                           | Cyclophilin<br>FKBP                       |
| <i>Cs</i> CFBP42.8  | ZP_01051599      | <i>Cellulophaga</i> sp. MED134            | Flavobacteria               | 390/42.8                           | Cyclophilin<br>FKBP                       |
| <i>Lb</i> CFBP44.4  | ZP_01061314      | <i>Leeuwenhoekiella blandensis</i>        | Flavobacteria               | 392/44.4                           | Cyclophilin<br>FKBP                       |
| <i>Dp</i> CFBP36.7  | YP_065381        | <i>Desulfotalea psychrophila</i>          | Proteobacteria              | 344/36.7                           | Cyclophilin<br>FKBP                       |

**Table S2: Protein sequences used to analyse evolution of cyclophilin domains in dual class immunophilins (continued)**

| Name               | Accession-no.    | Species                               | Group                    | Size (amino acids/kDa) | Domains <sup>a</sup>  |
|--------------------|------------------|---------------------------------------|--------------------------|------------------------|-----------------------|
| <i>Td</i> CFBP35.5 | NP_972990        | <i>Treponema denticola</i> ATCC 35405 | Spirochaetes             | 322/35.5               | Cyclophilin<br>FKBP   |
| <i>Bh</i> CFBP38   | YP_00188384<br>1 | <i>Borrelia hermsii</i> DAH           | Spirochaetes             | 339/38                 | Cyclophilin<br>FKBP   |
| <i>Hm</i> Cyp22.7  | YP_137701        | <i>Haloarcula marismortui</i>         | Archaea,<br>Halobacteria | 209/22.7               | Single<br>cyclophilin |
| <i>Hw</i> Cyp19.7  | YP_658820        | <i>Haloquadratum walsbyi</i>          | Archaea,<br>Halobacteria | 179/19.7               | Single<br>cyclophilin |
| <i>Mg</i> Cyp17.2  | XP_366921        | <i>Magnaporthe grisea</i>             | Fungi                    | 159/17.2               | Single<br>cyclophilin |
| <i>Pn</i> Cyp18    | EAT84755         | <i>Phaeosphaeria nodorum</i>          | Fungi                    | 164/18.0               | Single<br>cyclophilin |
| <i>Aa</i> Cyp19.4  | EAT41295         | <i>Aedes aegypti</i>                  | Insecta                  | 176/19.4               | Single<br>cyclophilin |

**Table S3: Protein sequences used to analyse evolution of FKBP domains in dual class immunophilins**

| Name                            | Accession-no.          | Species                                   | Group                      | Size (amino acids/kDa) | Domains <sup>a</sup>                              |
|---------------------------------|------------------------|-------------------------------------------|----------------------------|------------------------|---------------------------------------------------|
| <i>Pt</i> FCBP51.3              | XP_001444554           | <i>Paramecium tetraurelia</i> strain d4-2 | Ciliophora                 | 456/51.3               | FKBP<br>TPR repeats<br>cyclophilin                |
| <i>Pt</i> FCBP52.6              | XP_001445268           | <i>Paramecium tetraurelia</i> strain d4-2 | Ciliophora                 | 467/52.6               | FKBP<br>TPR repeats<br>cyclophilin                |
| <i>Tg</i> FCBP57.3              | AAX51680               | <i>Toxoplasma gondii</i>                  | Apicomplexa                | 521/57.3               | FKBP<br>TPR repeats<br>cyclophilin                |
| <i>Lm</i> FKBP47.7              | CAJ07250               | <i>Leishmania major</i>                   | Kinetoplastida             | 432/47.7               | FKBP<br>TRP                                       |
| <i>Tn</i> FKBP34.2              | CAG13057               | <i>Tetraodon nigroviridis</i>             | Vertebrata                 | 303/34.2               | FKBP<br>TRP                                       |
| <i>Pca</i> FCBP52.5             | BT031867               | <i>Phytophthora capsici</i>               | Oomycetes                  | 479/52.5               | FKBP<br>TPR repeats<br>cyclophilin                |
| <i>Tt</i> FCBP131.6             | XP_976669              | <i>Tetrahymena thermophila</i>            | Ciliophora                 | 1134/131.6             | ATB-binding<br>FKBP<br>TRP                        |
| <i>Ta</i> FCBP51.3              | XP_951815 <sup>b</sup> | <i>Theileria annulata</i>                 | Apicomplexa                | 459/51.3 <sup>b</sup>  | cyclophilin<br>FKBP<br>TPR repeats<br>cyclophilin |
| <i>Bb</i> FCBP51.1              | YP_001883841           | <i>Babesia bovis</i>                      | Apicomplexa                | 339/51.1               | FKBP<br>TPR repeats<br>cyclophilin                |
| <i>Tp</i> FCBP51.4              | XP_765469              | <i>Theileria parva</i>                    | Apicomplexa                | 460/51.4               | FKBP<br>TPR repeats<br>cyclophilin                |
| <i>Py</i> FKBP35                | XP_730233              | <i>Plasmodium yoelii</i>                  | Apicomplexa                | 306/35.0               | FKBP<br>TRP                                       |
| <i>Pc</i> FKBP31                | CAH81605               | <i>Plasmodium chabaudi</i>                | Apicomplexa                | 271/31.0               | FKBP<br>TRP                                       |
| <i>Pb</i> FKBP33.1              | XP_672280              | <i>Plasmodium berghei</i>                 | Apicomplexa                | 289/33.1               | FKBP<br>TRP                                       |
| <i>Pj</i> FKBP34.8              | NP_701815              | <i>Plasmodium falciparum</i>              | Apicomplexa                | 304/34.8               | FKBP<br>TRP                                       |
| <i>Ec</i> FKBP12.3 <sup>c</sup> | CAB57241               | <i>Entodinium caudatum</i>                | Ciliophora                 | 113/12.3               | Single FKBP                                       |
| <i>Ss</i> FKBP21.6              | NP_440378              | <i>Synechocystis</i> sp. PCC 6803         | Cyanobacteria              | 201/21.6               | Single FKBP                                       |
| <i>Te</i> FKBP21.6              | YP_721230              | <i>Trichodesmium erythraeum</i>           | Cyanobacteria              | 203/21.6               | Single FKBP                                       |
| <i>Td</i> CFBP35.5              | NP_972990              | <i>Treponema denticola</i> ATCC 35405     | Spirochaetes               | 322/35.5               | Cyclophilin<br>FKBP                               |
| <i>Cs</i> CFBP42.8              | ZP_01051599            | <i>Cellulophaga</i> sp. MED134            | Flavobacteria              | 390/42.8               | Cyclophilin<br>FKBP                               |
| <i>Lb</i> CFBP44.4              | ZP_01061314            | <i>Leeuwenhoekiella blandensis</i>        | Flavobacteria              | 392/44.4               | Cyclophilin<br>FKBP                               |
| <i>Gj</i> CFBP41                | CAL65762               | <i>Gramella forsetii</i>                  | Flavobacteria              | 376/41.0               | Cyclophilin<br>FKBP                               |
| <i>Fb</i> CFBP42.3              | ZP_01106954            | <i>Flavobacteriales bacterium</i>         | Flavobacteria              | 386/42.3               | Cyclophilin<br>FKBP                               |
| <i>Fb</i> CFBP42.1              | ZP_01202369            | <i>Flavobacteria bacterium</i>            | Flavobacteria              | 385/42.1               | Cyclophilin<br>FKBP                               |
| <i>Ca</i> CFBP41.7              | ZP_00950792            | <i>Croceibacter atlanticus</i>            | Flavobacteria              | 378/41.7               | Cyclophilin<br>FKBP                               |
| <i>Tc</i> MIP                   | Q09734                 | <i>Trypanosoma cruzi</i>                  | Kinetoplastida             | 192/22.1               | Single FKBP                                       |
| <i>No</i> FKBP22.1              | YP_343250              | <i>Nitrosococcus oceani</i>               | Proteobacteria             | 225/24.9               | FKBP_N<br>FKBP                                    |
| <i>Ps</i> FKBP14.5              | YP_548695              | <i>Polaromonas</i> sp. JS666              | Proteobacteria             | 140/14.5               | Single FKBP                                       |
| <i>Dp</i> CFBP36.7              | YP_065381              | <i>Desulfotalea psychrophila</i>          | Proteobacteria             | 344/36.7               | Cyclophilin<br>FKBP                               |
| <i>Yf</i> FKBP15.6              | XP_500249              | <i>Yarrowia lipolytica</i>                | Fungi                      | 144/15.6               | Single FKBP                                       |
| <i>Bh</i> CFBP38                | YP_001883841           | <i>Borrelia hermsii</i> DAH               | Spirochaetes               | 339/38                 | Cyclophilin<br>FKBP                               |
| <i>Gs</i> FKBP16.3              | ZP_01389980            | <i>Geobacter</i> sp. FRC-32               | Proteobacteria             | 150/16.3               | Single FKBP                                       |
| <i>Ar</i> FCBP38.1              | AAU82569               | uncultured archaeon GZfos18C8             | Archea                     | 357/38.1               | FKBP<br>Cyclophilin                               |
| <i>Ar</i> FCBP39.7              | CAI64202               | uncultured archaeon GZfos18C8             | Archea                     | 369/39.7               | FKBP<br>Cyclophilin                               |
| <i>Mba</i> FKBP18.8             | YP_305460              | <i>Methanosarcina barkeri</i>             | Archea,<br>Methanomicrobia | 169/18.8               | Single FKBP                                       |

**Table S3: Protein sequences used to analyse evolution of FKBP domains in dual class immunophilins (continued)**

| Name                | Accession-no. | Species                                         | Group                      | Size (amino acids/kDa)       | Domains <sup>a</sup> |
|---------------------|---------------|-------------------------------------------------|----------------------------|------------------------------|----------------------|
| <i>Mbu</i> FKBP16.6 | YP_566866     | <i>Methanococcoides burtonii</i>                | Archea,<br>Methanomicrobia | 152/16.6                     | Single FKBP          |
| <i>Mt</i> FKBP17.2  | O52980        | <i>Methanothermococcus thermolithotrophicus</i> | Archea,<br>Methanococci    | 154/17.2                     | Single FKBP          |
| <i>Mba</i> FKBP20.6 | YP_305459     | <i>Methanosarcina barkeri</i>                   | Archea,<br>Methanomicrobia | 189/20.6                     | Single FKBP          |
| <i>Ma</i> FKBP19.4  | NP_618030     | <i>Methanosarcina acetivorans</i>               | Archea,<br>Methanomicrobia | 181/19.4                     | Single FKBP          |
| <i>Mma</i> FKBP17.5 | ZP_01392854   | <i>Methanoculleus marisnigri</i>                | Archea,<br>Methanomicrobia | 167/17.5                     | Single FKBP          |
| <i>Or</i> CPR7      | CAL55134      | <i>Ostreococcus tauri</i>                       | Chlorophyta                | >266 (only partial sequence) | FCBP cyclophilin     |
| <i>Cj</i> FKBP15.4  | ZP_01386099   | <i>Chlorobium ferrooxidans</i>                  | Bacteria,<br>Chlorobia     | 142/15.4                     | Single FKBP          |
