# Supplementary material for: In silico analysis of the cyclophilin repertoire of apicomplexan parasites
Source: PubMed Central journal article supplement (PMC2713222; doi:10.1186/1756-3305-2-27), 2009-06-25
Supplement: 1756-3305-2-27-S5.pdf [file 1756-3305-2-27-S5.pdf]

### FCBPs and CFBPs from non-apicomplexa

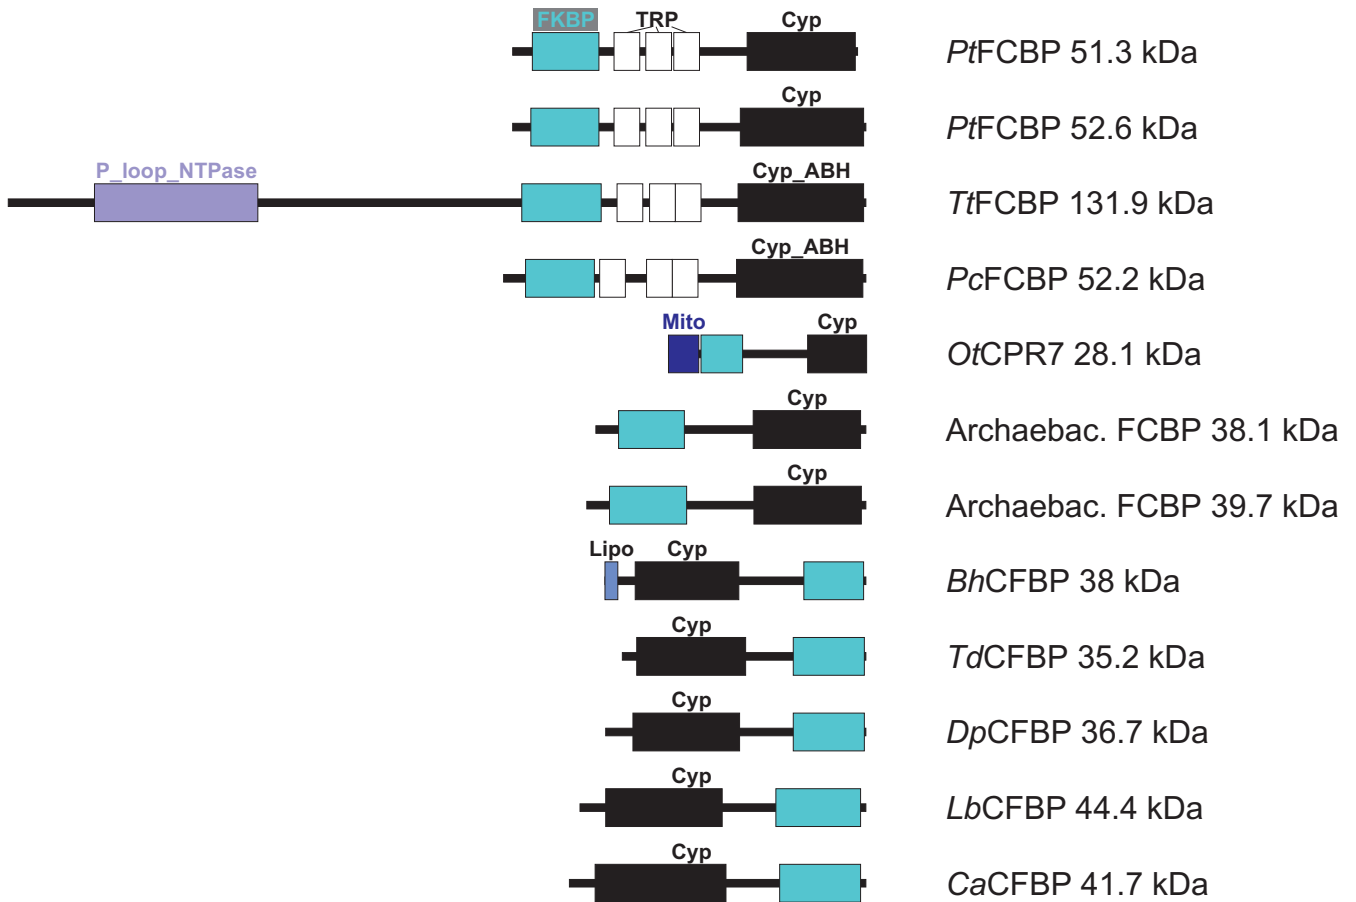

#### Figure S3 - FCBP and CFBP proteins in non-apicomplexa

Domain architecture of FCBPs and CFBPs from non-apicomplexan organisms. Species are abbreviated as in Fig. 1. Cyp\_ABH, ABH-type Cyp domain (CD accession-no.: cd01926); FKBP, FK506-binding domain (PFAM accession-no.: pfam00254); TPR, Tetratricopeptide repeat (InterProScan accession-no.: [IPR001440]); Mito, mitochondrial localization signal; Lipo, bacterial lipoprotein anchor sequence (PROSITE accession-no.: [PS51257]); P-loop NTPase, P-loop containing Nucleoside Triphosphate Hydrolases (CD accession-no.: [c109099]).
