# Supplementary material for: In silico analysis of the cyclophilin repertoire of apicomplexan parasites
Source: PubMed Central journal article supplement (PMC2713222; doi:10.1186/1756-3305-2-27), 2009-06-25
Supplement: 1756-3305-2-27-S6.pdf [file 1756-3305-2-27-S6.pdf]

## PPIL1-like cyclophilins

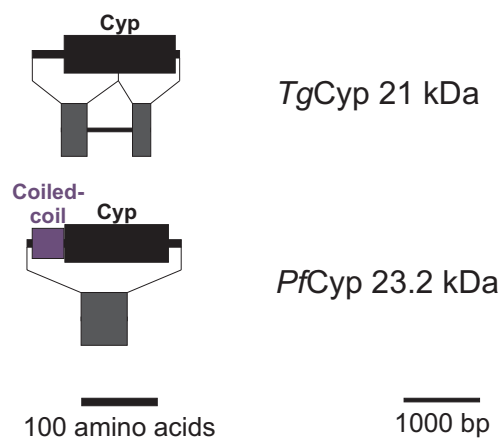

### Figure S4 - PPIL1-like Cyps

Domain architecture and genomic organization of PPIL1-like Cyps. Species are abbreviated as in Fig. 1. Cyp, domain belonging to the Cyp superfamily (CD accession-no: [c100197]); Coiled-coil, coiled-coil protein interaction region.
