# Supplementary material for: In silico analysis of the cyclophilin repertoire of apicomplexan parasites
Source: PubMed Central journal article supplement (PMC2713222; doi:10.1186/1756-3305-2-27), 2009-06-25
Supplement: 1756-3305-2-27-S7.pdf [file 1756-3305-2-27-S7.pdf]

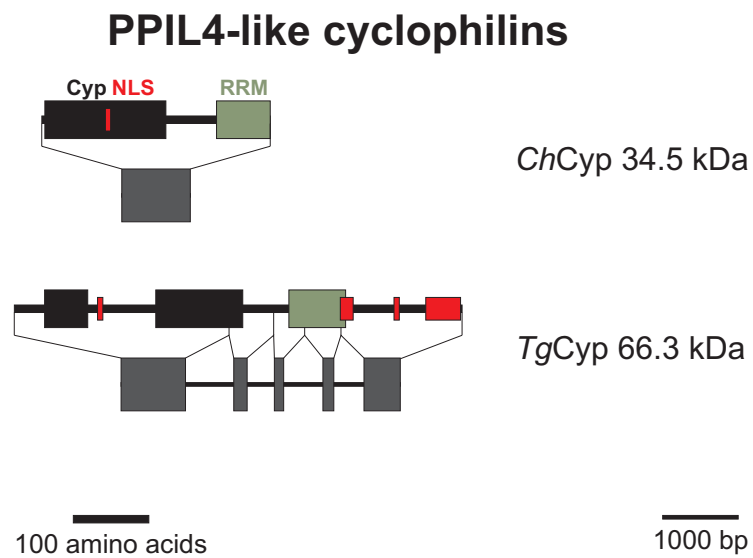

**Figure S5 - PPIL4-like Cyps**

Domain architecture and genomic organization of *ChCyp*34.5, the only apicomplexan PPIL4-like Cyp which contains an RNA recognition motif. Species are abbreviated as in Fig. 1. Cyp, Cyp superfamily domain (CD accession-no.: [cl00197]); NLS, nuclear localization signal; RRM, RNA recognition motif (CD accession-no.: cd00590).
